# Supplementary material
Source: PubMed Central journal article supplement (PMC5621944)
Supplement: supp_5.3.E694_2017-0058-1-at.pdf [file supp_5.3.E694_2017-0058-1-at.pdf]

Appendix 1 (as supplied by the authors): Supplementary tables

Supplementary Table 1. Pre-baseline self-harm according to self-report and medical records, according to self-harm category, demographic and criminogenic characteristics.

|                                             |                | Total (N) | Self-harm category   |                             |                       |                             | p-value |
|---------------------------------------------|----------------|-----------|----------------------|-----------------------------|-----------------------|-----------------------------|---------|
|                                             |                |           | True positive (N, %) | Unconfirmed positive (N, %) | False negative (N, %) | Unconfirmed negative (N, %) |         |
| <b>Gender</b>                               | Male           | 1037      | 41 (4.0)             | 93 (9.0)                    | 78 (7.5)              | 825 (79.6)                  | 0.005   |
|                                             | Female         | 278       | 23 (8.3)             | 29 (10.4)                   | 28 (10.1)             | 198 (71.2)                  |         |
| <b>Age at index release (yrs)</b>           | 18-24          | 336       | 17 (5.1)             | 41 (12.2)                   | 15 (4.5)              | 263 (78.3)                  | <0.001  |
|                                             | 25-39          | 681       | 38 (5.6)             | 67 (9.8)                    | 70 (10.3)             | 506 (74.3)                  |         |
|                                             | 40+            | 298       | 9 (3.0)              | 14 (4.7)                    | 21 (7.0)              | 254 (85.2)                  |         |
| <b>Indigenous status<sup>§</sup></b>        | Non-Indigenous | 979       | 47 (4.8)             | 87 (8.9)                    | 74 (7.6)              | 771 (78.8)                  | 0.509   |
|                                             | Indigenous     | 336       | 17 (5.1)             | 35 (10.4)                   | 32 (9.5)              | 252 (75.0)                  |         |
| <b>In a relationship<sup>§</sup></b>        | No             | 863       | 45 (5.2)             | 85 (9.8)                    | 77 (8.9)              | 656 (76.0)                  | 0.184   |
|                                             | Yes            | 452       | 19 (4.2)             | 37 (8.2)                    | 29 (6.4)              | 367 (81.2)                  |         |
| <b>Years of education<sup>§</sup></b>       | >10 years      | 741       | 28 (3.8)             | 66 (8.9)                    | 56 (7.6)              | 591 (79.8)                  | 0.124   |
|                                             | <10 years      | 574       | 36 (6.3)             | 56 (9.8)                    | 50 (8.7)              | 432 (75.3)                  |         |
| <b>Sexual identity<sup>§</sup></b>          | Heterosexual   | 1234      | 51 (4.1)             | 107 (8.7)                   | 98 (7.9)              | 978 (79.3)                  | <0.001  |
|                                             | LGBT           | 80        | 13 (16.3)            | 15 (18.8)                   | 10.0                  | 44 (55.0)                   |         |
| <b>QCS self-harm flag</b>                   | No             | 1010      | 26 (2.6)             | 60 (5.9)                    | 63 (6.2)              | 861 (85.2)                  | >0.001  |
|                                             | Yes            | 292       | 37 (12.7)            | 59 (20.2)                   | 43 (14.7)             | 153 (52.4)                  |         |
| <b>Previous suicide attempt<sup>§</sup></b> | No             | 1035      | 19 (1.8)             | 62 (6.0)                    | 66 (6.4)              | 888 (85.8)                  | <0.001  |

|                                                        |     |     |           |           |           |            |        |
|--------------------------------------------------------|-----|-----|-----------|-----------|-----------|------------|--------|
|                                                        | Yes | 280 | 45 (16.1) | 60 (21.4) | 40 (14.3) | 135 (48.2) |        |
|                                                        |     |     |           |           |           |            |        |
| <b>Lifetime history of mental disorder<sup>§</sup></b> | No  | 742 | 12 (1.6)  | 29 (3.9)  | 48 (6.5)  | 653 (88.0) | <0.001 |
|                                                        | Yes | 572 | 52 (9.1)  | 93 (16.2) | 58 (10.1) | 369 (64.5) |        |
|                                                        |     |     |           |           |           |            |        |
| <b>Most serious offence violent</b>                    | No  | 615 | 29 (4.7)  | 60 (9.8)  | 38 (6.2)  | 488 (79.3) | 0.095  |
|                                                        | Yes | 687 | 34 (4.9)  | 59 (8.6)  | 68 (9.9)  | 526 (76.6) |        |

LGBT: Lesbian, gay, bisexual, transgender; QCS: Queensland Corrective Services; <sup>§</sup>Self-reported

**Supplementary Table 2. Post-baseline medically verified self-harm events by participants according to self-harm category and demographic variables.**

|                                                             |                      | Post-baseline medically verified self-harm event |      |                              |      |                 |       | HR (95%CI)        | AHR (95%CI)      |
|-------------------------------------------------------------|----------------------|--------------------------------------------------|------|------------------------------|------|-----------------|-------|-------------------|------------------|
|                                                             |                      | No events recorded<br>(N, %)                     |      | ≥1 events recorded<br>(N, %) |      | Total<br>(N, %) |       |                   |                  |
| <b>Self-harm validation diagnostic test group indicator</b> | True positive        | 35                                               | 54.7 | 29                           | 45.3 | 64              | 100.0 | 10.6 (6.5 - 17.1) | 6.2 (3.3 - 10.4) |
|                                                             | False negative       | 82                                               | 77.4 | 24                           | 22.6 | 106             | 100.0 | 5.8 (3.4 - 8.9)   | 4.0 (2.2 - 6.7)  |
|                                                             | Unconfirmed positive | 101                                              | 82.8 | 21                           | 17.2 | 122             | 100.0 | 3.4 (2.0 - 5.8)   | 2.2 (1.2 - 3.9)  |
|                                                             | Unconfirmed negative | 965                                              | 94.3 | 58                           | 5.7  | 1023            | 100.0 | ref.              | ref.             |
| <b>Gender</b>                                               | Male                 | 942                                              | 90.8 | 95                           | 9.2  | 1037            | 100.0 | ref.              | ref.             |
|                                                             | Female               | 241                                              | 86.7 | 37                           | 13.3 | 278             | 100.0 | 1.3 (0.9 - 1.9)   | 0.9 (0.6 - 1.5)  |
| <b>Age at release (yrs)</b>                                 | 18-24                | 303                                              | 90.2 | 33                           | 9.8  | 336             | 100.0 | ref.              | ref.             |
|                                                             | 25-39                | 605                                              | 88.8 | 76                           | 11.2 | 681             | 100.0 | 1.1 (0.7 - 1.6)   | 0.9 (0.6 - 1.5)  |
|                                                             | 40+                  | 275                                              | 92.3 | 23                           | 7.7  | 298             | 100.0 | 0.7 (0.3 - 1.2)   | 0.8 (0.4 - 1.5)  |
| <b>Indigenous status</b>                                    | Non-Indigenous       | 894                                              | 91.3 | 85                           | 8.7  | 979             | 100.0 | ref.              | ref.             |
|                                                             | Indigenous           | 289                                              | 86.0 | 47                           | 14   | 336             | 100.0 | 1.9 (1.3 - 2.9)   | 2.0 (1.3 - 3.1)  |
| <b>In a relationship</b>                                    | No                   | 767                                              | 88.9 | 96                           | 11.1 | 863             | 100.0 | ref.              | ref.             |
|                                                             | Yes                  | 416                                              | 92.0 | 36                           | 8.0  | 452             | 100.0 | 0.6 (0.5 - 1.0)   | 0.9 (0.6 - 1.3)  |
| <b>Years of education</b>                                   | ≥10 years            | 676                                              | 91.2 | 65                           | 8.8  | 741             | 100.0 | ref.              | ref.             |
|                                                             | <10 years            | 507                                              | 88.3 | 67                           | 11.7 | 574             | 100.0 | 1.4 (1.0 - 2.0)   | 1.1 (0.8 - 1.7)  |
| <b>Sexuality</b>                                            | Heterosexual         | 1117                                             | 90.5 | 117                          | 9.5  | 1234            | 100.0 | ref.              | ref.             |
|                                                             | LGBT                 | 65                                               | 81.3 | 15                           | 18.8 | 80              | 100.0 | 2.2 (1.1 - 3.6)   | 1.3 (0.6 - 2.7)  |

|                                                        |     |     |      |    |      |      |       |                 |                 |
|--------------------------------------------------------|-----|-----|------|----|------|------|-------|-----------------|-----------------|
| <b>QCS self-harm flag</b>                              | No  | 933 | 92.4 | 77 | 7.6  | 1010 | 100.0 | ref.            | ref.            |
|                                                        | Yes | 239 | 81.8 | 53 | 18.2 | 292  | 100.0 | 3.0 (2.0 – 4.2) | 1.4 (0.9 – 2.1) |
| <b>Previous suicide attempt<sup>§</sup></b>            | No  | 961 | 92.9 | 74 | 7.1  | 1035 | 100.0 | ref.            | ref.            |
|                                                        | Yes | 222 | 79.3 | 58 | 20.7 | 280  | 100.0 | 2.9 (2.0 – 4.2) | 1.2 (0.8 – 1.8) |
| <b>Lifetime history of mental disorder<sup>§</sup></b> | No  | 695 | 93.7 | 47 | 6.3  | 742  | 100.0 | ref.            | ref.            |
|                                                        | Yes | 487 | 85.1 | 85 | 14.9 | 572  | 100.0 | 2.6 (1.8 – 3.9) | 1.6 (1.1 – 2.6) |
| <b>Most serious offence violent</b>                    | No  | 557 | 90.6 | 58 | 9.4  | 615  | 100.0 | ref.            | ref.            |
|                                                        | Yes | 615 | 89.5 | 72 | 10.5 | 687  | 100.0 | 1.1 (0.8 – 1.7) | 1.0 (0.7 – 1.5) |

LGBT: Lesbian, gay, bisexual, transgender; QCS: Queensland Corrective Services; <sup>§</sup>Self-reported
